# Supplementary material for: Iron in parasitic protists – from uptake to storage and where we can interfere
Source: Royal Society of Chemistry journal article supplement (doi:10.1039/d0mt00125b), 2020-06-30
Supplement: d0mt00125b1.xlsx [file d0mt00125b1.xlsx]

## Sheet: List1
		plasma/vacuolar iron permease	multicopper ferroxidase	NRAMP1/2 (DMT1)	VIT1/CCC1	Ferroportin	Ferritin	Heme oxygenase	Ferrochelatase	Mitoferrin (MRS3/4)	MMT1/2
Alveolata	Plasmodium falciparum			XP_001351794.1	XP_001350634.1			XP_001347401.2		XP_001351926.1
	Plasmodium knowlesi			XP_002259573.1	XP_002262306.1			XP_002258757.1		XP_002258323.1
	Plasmodium malariae			XP_028861983.1	XP_028864473.1			XP_028861125.1		XP_028860638.1
	Plasmodium vivax			VUZ96400.1	XP_001617325.1			XP_001614430.1		VUZ94663.1
	Plasmodium berghei			XP_022713456.1	XP_678837.1			XP_022713316.1		XP_022712214.1
	Toxoplasma gondii			KYF45582.1	XP_002368759.1					KYF40565.1
	Neospora caninum			XP_003880847.1	XP_003880882.1
	Cryptosporidium hominis				PPS95964.1					XP_668408.1
	Chromera velia		Cvel_11504.t1-p1; Cvel_20781.t1-p1	Cvel_1969.t1-p1; Cvel_16331.t1-p1	Cvel_5472.t1-p1; Cvel_9602.t1-p1; Cvel_13937.t1-p1; Cvel_17121.t1-p1; Cvel_23649.t1-p1	Cvel_7893.t1-p1		Cvel_1959.t1-p1		Cvel_29625.t1-p1
	Vitrella brassicaformis		CEM04768	CEL95404	CEM32012	CEL98485	CEM16013	CEL92525; CEL99648; CEM07662		CEL93135
Euglenozoa	Trypanosoma cruzi				XP_814955.1			detection based on antibody		XP_804830.1	XP_807884
	Trypanosoma brucei				XP_011771997.1; XP_011772465.1					XP_843891.1	XP_828064
	Leishmania major				XP_003721827.1			only detected in L. tarentolae by activity		XP_003722361.1	XP_001682726
Heterolobosea	Naegleria fowleri					NF0014540	NF0106200			NF0079420	NF0116420
Amoebozoa	Acanthamoeba castellanii			XP_004346469.1	XP_004345882.1; XP_004333710.1	XP_004354546.1; XP_004356781.1; XP_004367695.1				XP_004356448.1	XP_004335643.1; XP_004336299.1
	Mastigamoeba balamuthi						m51a1_g14107
	Entamoeba histolytica							monooxygenase (EHI_009840)	EHI_095090		EHI_069990A
Metamonada	Trichomonas vaginalis						XP_001296234.1
	Giardia intestinalis
	Monocercomonoides						MONOS_1659; MONOS_10008
Fungi	Candida albicans	XP_723488.2; XP_715020.1; XP_715031.1	XP_716782.1; XP_711267.2; XP_711265.2; XP_711264.1; KGR10899.1	XP_722225.2; XP_719516.1; XP_714860.2; XP_722757.1	XP_712749.1			XP_719035.1			XP_710863.2
	Schizosaccharomyces pombe	NP_594493.1	NP_594494.1	NP_594537.1	NP_595066.1					NP_594283.1; NP_595139.1	NP_001342724.1
	Cryptococcus neoformans	XP_569122.1; XP_024512476.1; XP_568258.1	XP_024512475.1; XP_774373.1; XP_774374.1; XP_567266.1; XP_568259.1	XP_772420.1	XP_568012.1	XP_771872.1		XP_571263.1		XP_024512952.1	XP_567023.1
	Pneumocystis jirovecii
	Encephalitozoon intestinalis						XP_003073099.1
	Saccharomyces cerevisiae	NP_009766.4; NP_011072.1	NP_010794.3; NP_116612.1; NP_013774.1	NP_011917.1; NP_013134.1; NP_014519.1	NP_013321.1			NP_013306.2		NP_012402.1; NP_012978.1	NP_013902.1; NP_015100.2
	Mitosporidium daphniae						XP_013239528.1	XP_013236463.1		XP_013237250.1
